# Supplementary material for: Ag-grafted covalent imine network material for one-pot three-component coupling and hydration of nitriles to amides in aqueous medium
Source: Royal Society of Chemistry journal article supplement (doi:10.1039/c4ra07622b), 2014-01-01
Supplement: c4ra07622b1.pdf [file c4ra07622b1.pdf]

## Electronic Supplementary Information

### **Ag-grafted covalent imine network material for one-pot three-component coupling and hydration of nitriles to amides in aqueous medium**

Noor Salam,<sup>a</sup> Sudipta K. Kundu,<sup>b</sup> Rostam Ali Molla<sup>a</sup>, Paramita Mondal<sup>a</sup>,

Asim Bhaumik<sup>b,\*</sup> and Sk. Manirul Islam<sup>a,\*</sup>

<sup>a</sup>Department of Chemistry, University of Kalyani, Kalyani, Nadia, 741235, W.B., India.

<sup>b</sup>Department of Material Science, Indian Association for the Cultivation of Science,  
Kolkata - 700032, India

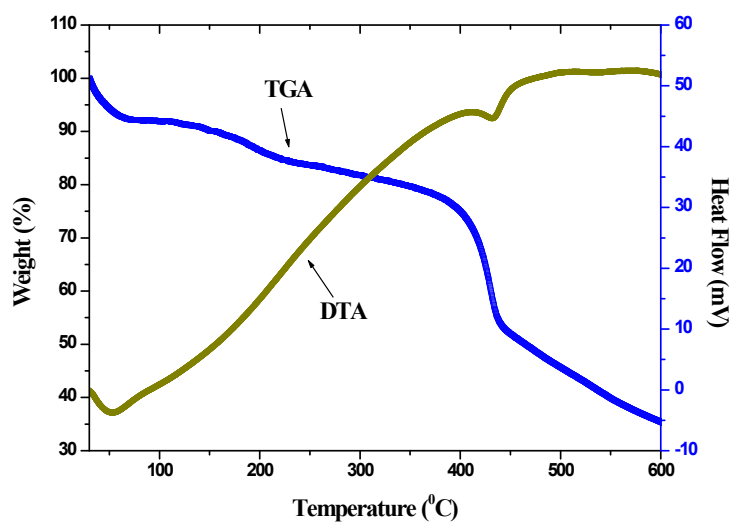

**Figure S1:** TGA (a) and DTA (b) profiles of Ag-CIN-1 material

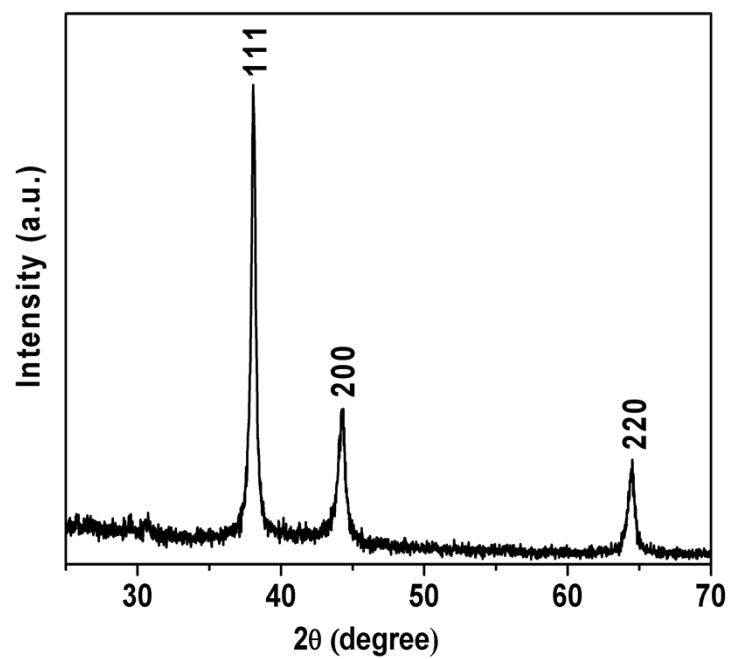

Figure  
XRD  
Reused  
CIN-1  
catalyst

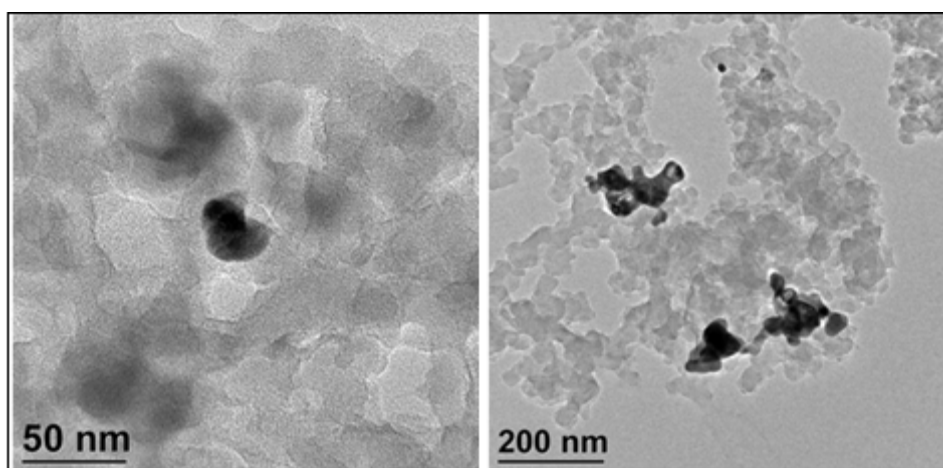

S2:  
Ag-

Figure S3: TEM Reused Ag-CIN-1 catalyst

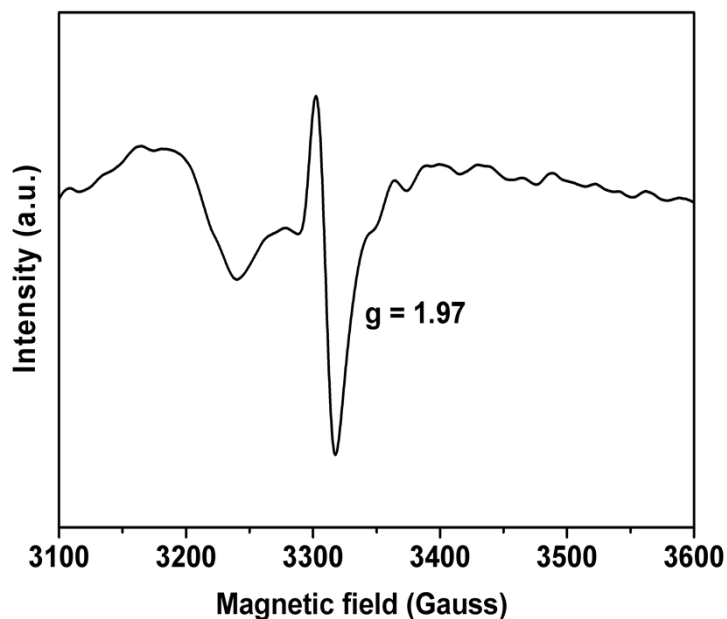

Figure S4: TEM Reused Ag-CIN-1 catalyst

### Spectral data of the isolated product:

#### The three-component ( $A^3$ ) coupling reaction:

##### 1-(1,3-Diphenylprop-2-ynyl)pyrrolidine<sup>1</sup> (Entry1)

<sup>1</sup>H NMR (CDCl<sub>3</sub>, 500MHz, ppm):  $\delta$ = 1.84 (s, 4H), 2.73 (s, 4H), 4.92 (s, 1H), 7.30–7.38 (m, 4H), 7.43 (t, 2H), 7.51–7.50 (m, 2H), 7.62–7.65 (m, 2H).

##### 1-(1-(4-Methoxyphenyl)-3-phenylprop-2-ynyl) pyrrolidine<sup>1</sup> (Entry2)

<sup>1</sup>H NMR (CDCl<sub>3</sub>, 500MHz, ppm):  $\delta$ = 1.82 (m, 4H), 2.73 (m, 4H), 3.81 (s, 3H), 4.82 (s, 1H), 6.93 (d, 2H), 7.33 (m, 3H), 7.50–7.51 (m, 2H), 7.50–7.52 (m, 2H).

##### N-[1-(4-Methylphenyl)-3-phenyl-2-propynyl]piperidine<sup>2</sup> (Entry3)

<sup>1</sup>H-NMR (CDCl<sub>3</sub>, 400MHz, ppm)  $\delta$ =7.61–7.54(m, 4H), 7.40–7.34(m, 3H), 7.21(d, 2H), 4.81(s, 1H), 2.65–2.56(m, 4H), 2.40 (s, 3H), 1.73–1.55(m, 4H), 1.58–1.43(m, 2H)

##### N-[1-(4-Ethylphenyl)-3-phenyl-2-propynyl]piperidine<sup>2</sup> (Entry4)

<sup>1</sup>H-NMR (CDCl<sub>3</sub>, 400MHz, ppm)  $\delta$ =7.53–7.46(m, 4H), 7.35–7.26(m, 3H), 7.18(d, 2H), 4.76(s, 1H), 2.62(q, 2H), 2.60–2.47(m, 4H), 1.64–1.50(m, 4H), 1.50–1.35(m, 2H), 1.23(t, 3H)

##### 1-(1-(4-Chlorophenyl)-3-phenylprop-2-ynyl) pyrrolidine<sup>1</sup> (Entry5)

<sup>1</sup>H NMR (CDCl<sub>3</sub>, 500MHz, ppm):  $\delta$ = 1.80(m, 4H), 2.71 (m, 4H), 4.93 (s, 1H), 7.34–7.35 (m, 5H), 7.50–7.51 (m, 2H), 7.55–7.63 (m, 2H).

**N-[1-(4-Bromophenyl)-3-phenyl-2-propynyl]piperidine<sup>2</sup> (Entry6)**

<sup>1</sup>H-NMR (CDCl<sub>3</sub>, 400MHz, ppm) δ=7.61-7.57(m, 4H), 7.52-7.53(m, 2H), 7.40-7.36(m, 3H), 4.81(s, 1H), 2.65-2.55(m, 4H), 1.73-1.59(m, 4H), 1.58-1.45(m, 2H);

**N-(3-Phenyl)-prop-2-ynyl piperidine<sup>3</sup> (Entry7)**

<sup>1</sup>H-NMR (CDCl<sub>3</sub>, 400MHz, ppm): δ= 7.43-7.40 (m, 2H), 7.33-7.28 (m, 3H), 3.45 (s, 2H), 2.56 (br, 4H), 1.69-1.61 (m, 4H), 1.45 (br, 2H).

**N-(1-Isopropyl-3-phenyl-2-propynyl) piperidine<sup>3</sup> (Entry8)**

<sup>1</sup>H-NMR (CDCl<sub>3</sub>, 400MHz, ppm): δ= 7.45–7.44 (m, 2H), 7.34–7.32 (m, 3H), 3.03 (d, 1H), 2.69–2.64 (m, 2H), 2.43 (br, 2H), 1.97-1.90 (m, 1H), 1.65–1.58 (m, 4H), 1.49–1.47 (m, 2H), 1.10 (d, 3H), 1.01 (d, 3H).

**4-(3-Phenyl-1-piperidin-1-yl-prop-2-ynyl)-pyridine<sup>4</sup> (Entry10)**

<sup>1</sup>H NMR (300 MHz, CDCl<sub>3</sub>, ppm): δ= 0.83– 0.89 (m, 2H), 1.37–1.48 (m, 4H), 2.45–2.50 (m, 4H), 4.75 (s, 1H), 7.28–7.32 (m, 5H), 7.49 (d, 2H), 7.64 (d, 2H)

**1-(1-Phenyl-3-p-tolyl-prop-2-ynyl)-piperidine<sup>4</sup> (Entry12)**

<sup>1</sup>H NMR (300 MHz, CDCl<sub>3</sub> ppm): δ= 1.40–1.61 (m, 2H), 1.55–1.62 (m, 4H), 2.50–2.57 (m, 4H), 2.37 (s, 3H), 4.75 (s, 1H), 7.1 (d, 2H), 7.22–7.40 (m, 5H), 7.60 (d, 2H).

**4-(1, 3 diphenylprop-2-ynyl) morpholine<sup>5</sup> (Entry14)**

<sup>1</sup>H NMR (300 MHz, CDCl<sub>3</sub>, ppm): δ= 7.64-7.57 (m, 2H), 7.55-7.40 (m, 3H), 7.40-7.21 (m, 5H), 4.77 (s, 1H), 3.81-3.64 (m, 4H), 2.70-2.52 (m, 4H).

**1-(1,3-diphenylprop-2-ynyl)pyrrolidine<sup>6</sup> (Entry15)**

<sup>1</sup>H NMR (300 MHz, CDCl<sub>3</sub> ppm): δ= 7.61–7.57 (m, 2H), 7.51–7.45 (m, 2H), 7.34–7.28 (m, 6H), 4.88(s, 1H), 2.70–2.65 (m, 4H), 1.80–1.75(m, 4H).

**N-[1-(Furfuryl)-3-phenyl-2-propynyl]piperidine<sup>7</sup> (Entry16)**

<sup>1</sup>H NMR (100 MHz, CDCl<sub>3</sub> ppm): δ= 7.34-7.60 (m, 8H), 4.75 (s, 3H), 2.63-2.75 (m, 4H), 1.43-1.78 (m, 6H).

**(1,3-Diphenyl-prop-2-ynyl)diethylamine (Entry 17)**

<sup>1</sup>H NMR (300 MHz, CDCl<sub>3</sub>, ppm): δ 0.97-1.04 (m, 6H), δ 2.40-2.62 (m, 4H), δ 4.97 (s, 1H), δ 7.24-7.27 (m, 5H), δ 7.41-7.44 (m, 3H), δ 7.59-7.61 (m, 2H).

**Table 2, Entry 1**

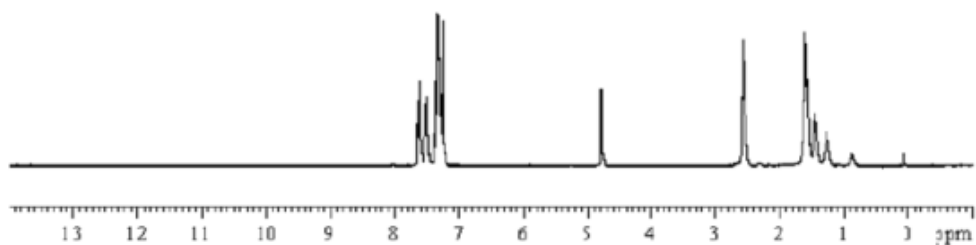

**Table 2, Entry 2**

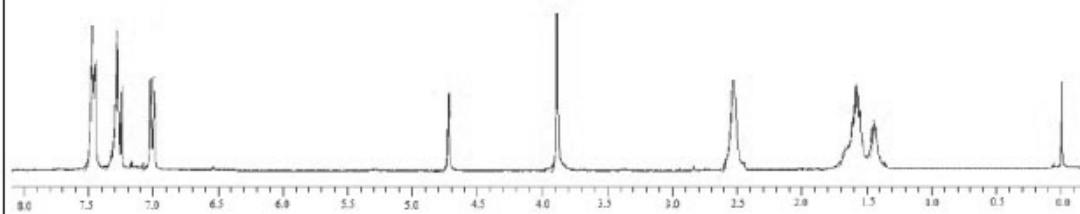

**Table 2, Entry 3**

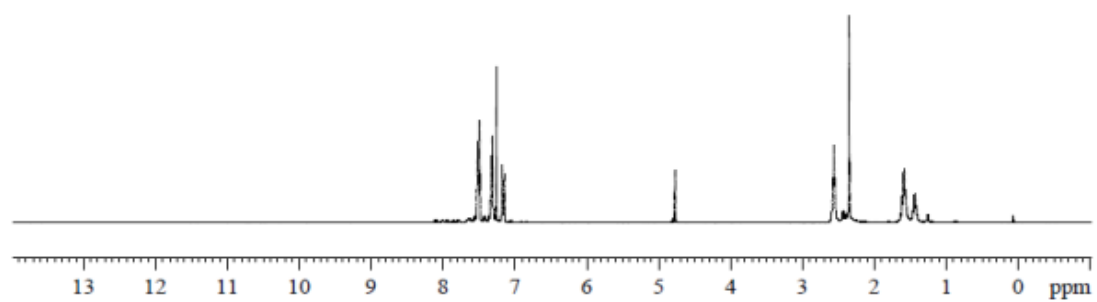

**Table 2, Entry 5**

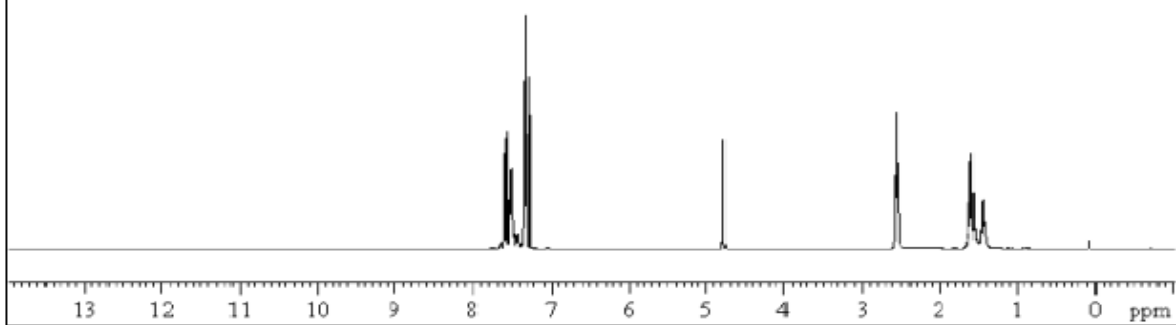

**Table 2, Entry 6**

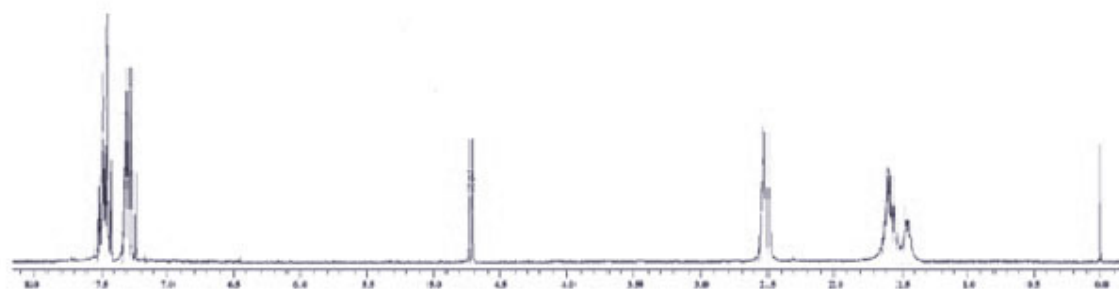

**Table 2, Entry 7**

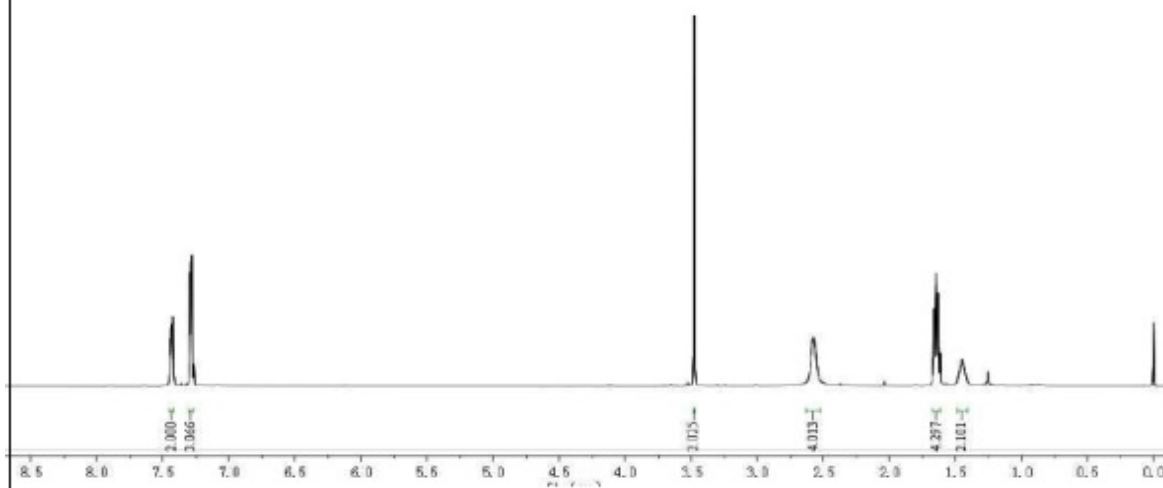

**Table 2, Entry 8**

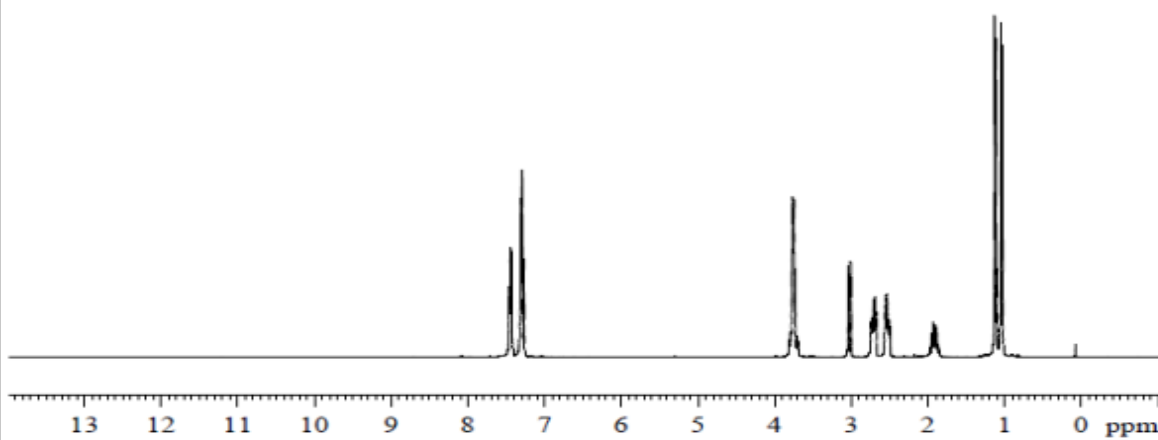

**Table 2, Entry 9**

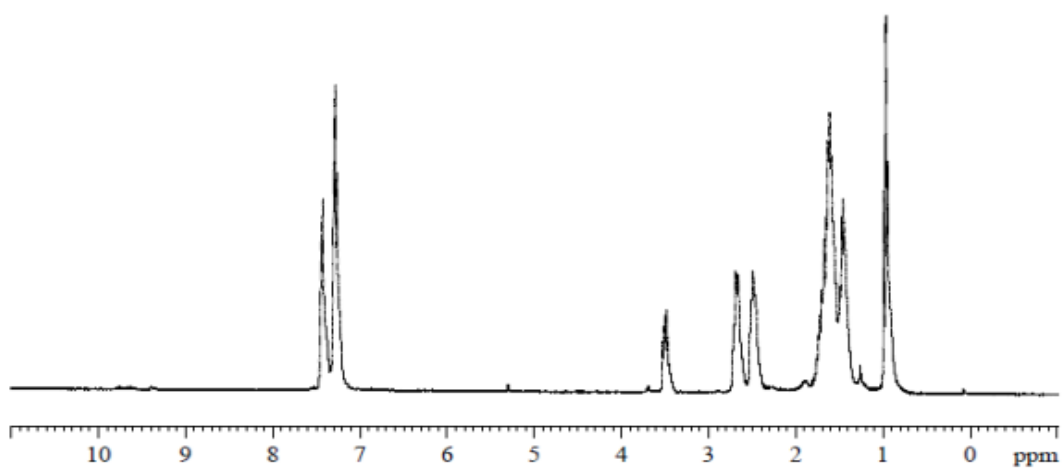



Table 2, Entry 11

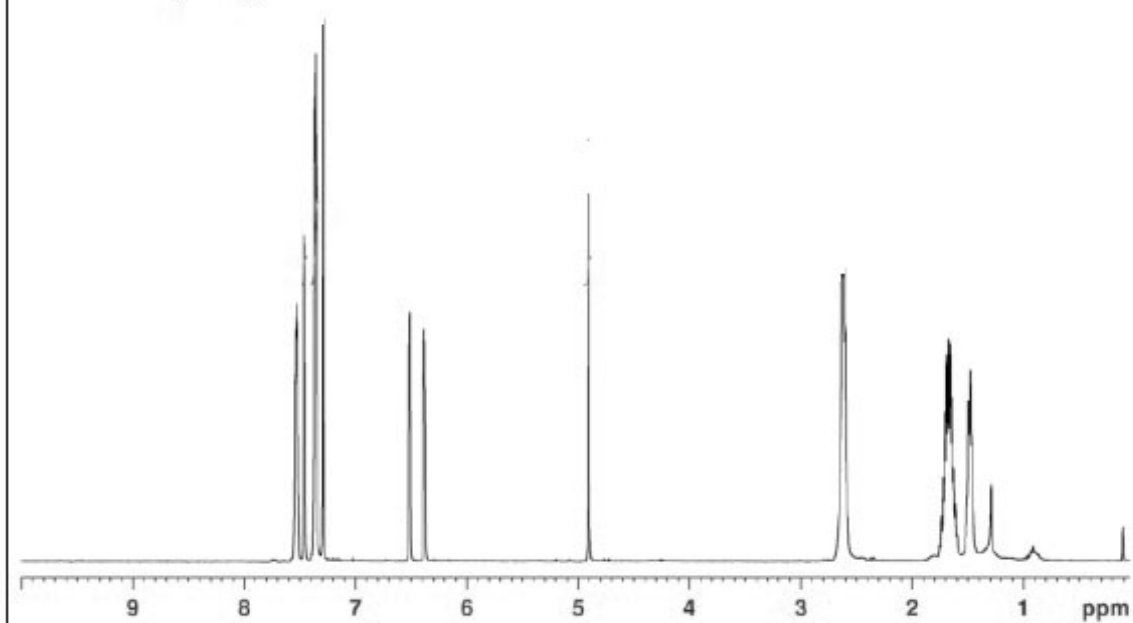

Table 2, Entry 12

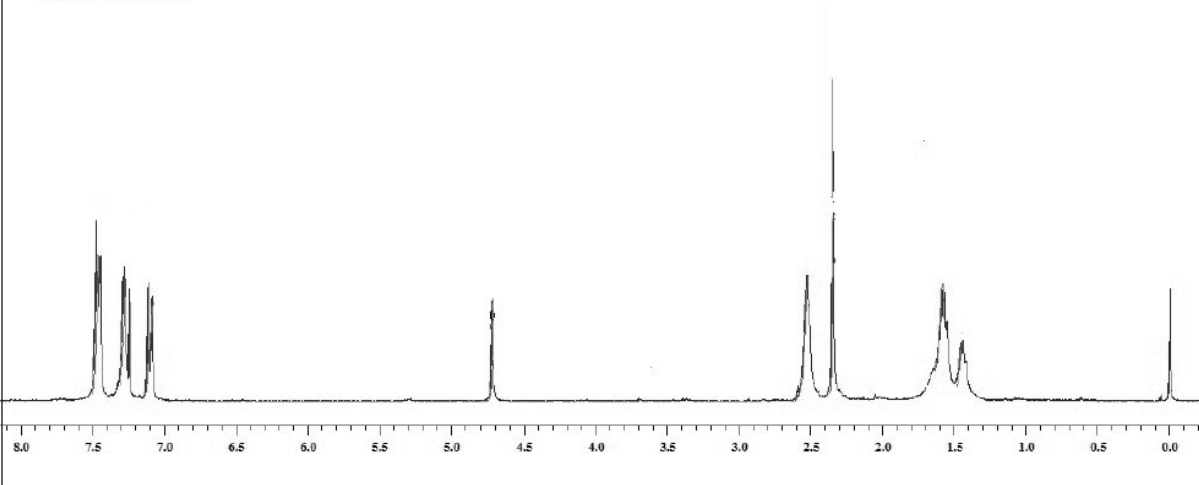

**Table 2 , Entry 13**

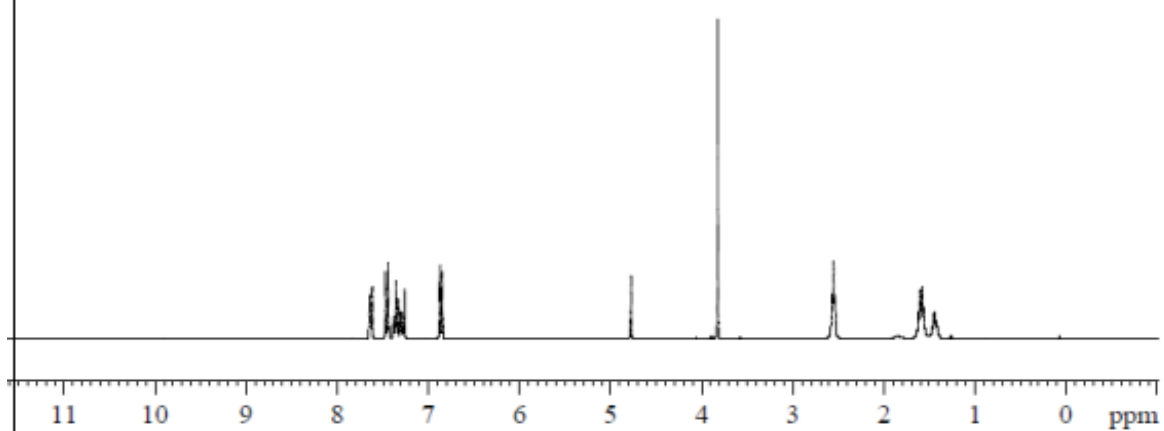

**Table 2, Entry 14**

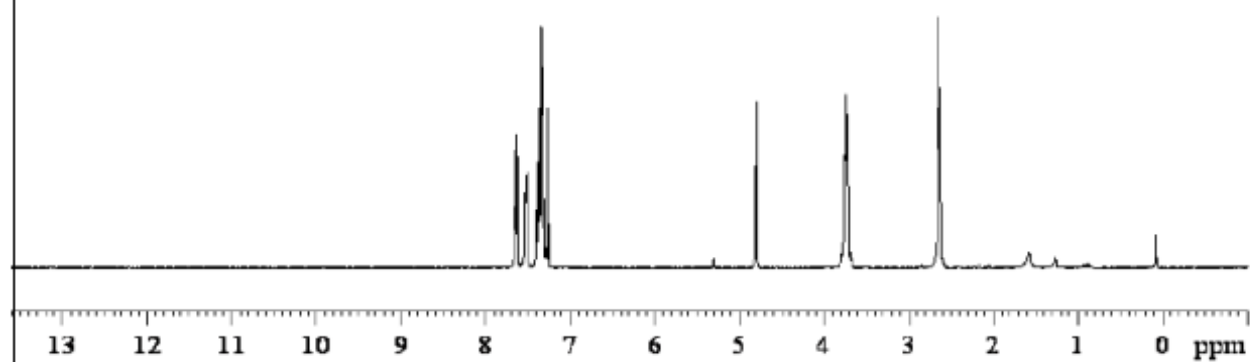

**Table 2, Entry 15**

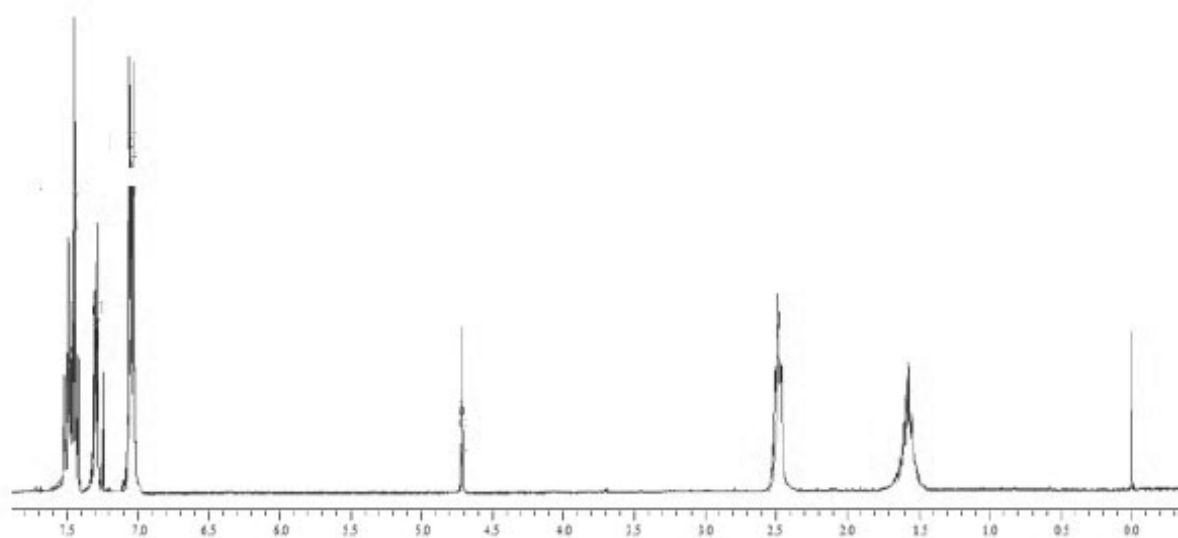

**Table 2, Entry 16**

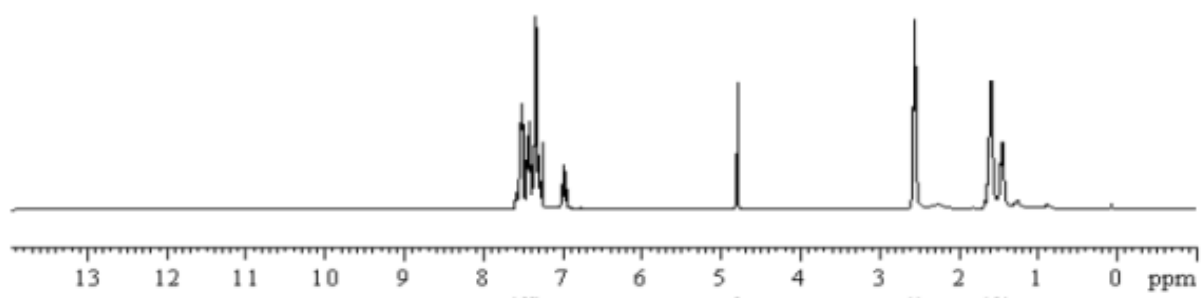

**Table 2, Entry 17**

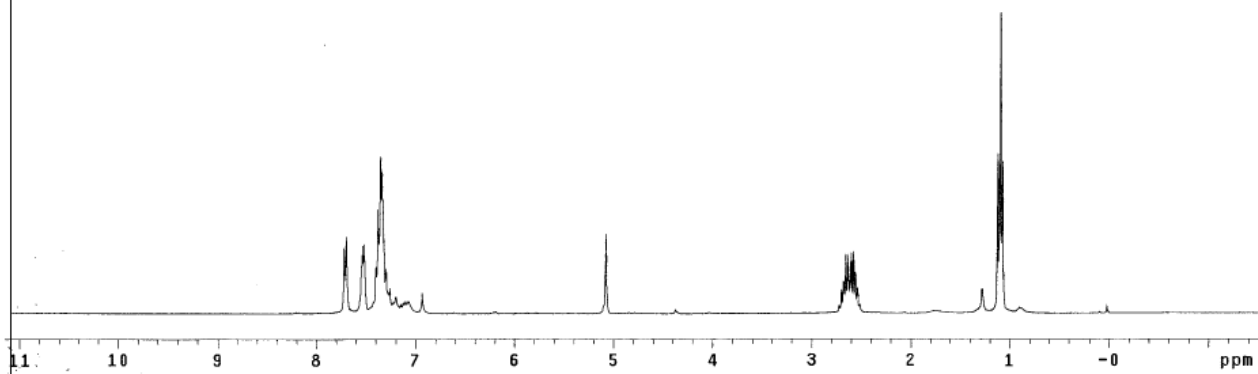

## Reference

1. Y. Zhao, X. Zhou, T. Okamura, M. Chen, Y. Lu, W. Y. Sun and J. Q. Yu, *Dalton Trans.*, 2012, **41**, 5889–5896.
2. C. Wei, Z. Li and C.-J. Li, *Org. Lett.*, 2003, **5**, 4473-4475.
3. X. Huo, J. Liu, B. Wang, H. Zhang, Z. Yang, X. She and P. Xi, *J. Mater. Chem. A*, 2013, **1**, 651–656.
4. B. Sreedhar, P. S. Reddy, C. S. V. Krishna and P. V. Babu, *Tetrahedron Lett.*, 2007, **48**, 7882–7886.
5. J. Dulle, K. Thirunavukkarasu, M. C. M. Hazeleger, D. V. Andreeva, N. R. Shiju and G. Rothenberg, *Green Chem.*, 2013, **15**, 1238–1243.
6. V. K. Y. Lo, K. K. Y. Kung, M. K. Wong and C. M. Che, *J. Org. Chem.*, 2009, **694**, 583–591.
7. H. Eshghi, G. H. Zohuri and S. Damavandi, *Eur. J. Chem.*, 2011, **2**, 100-103.
